# Supplementary material for: Construction of a Chikungunya Virus, Replicon, and Helper Plasmids for Transfection of Mammalian Cells
Source: MDPI journal article supplement (doi:10.3390/v15010132), 2022-12-31

## Supplementary information

**Table S1. Primers used to clone the plasmids**

| Primers      | Sequence 5' to 3'                                     |
|--------------|-------------------------------------------------------|
| SP6toBamHI-F | GCTCCTGGATCCAGGTGACAC                                 |
| SP6toBamHI-R | GTGTCACCTGGATCCAGGAGC                                 |
| DelNsP4-F    | CATGGCCACCTTTGCAAG                                    |
| DelNsP1-R    | CTTCCTGTCCGACATCATC                                   |
| DelCPE3-F    | GCCATTATGGTGAGCGAG                                    |
| DelCPE3-R    | CTCCATTATGGCTGATTGG                                   |
| DelFMtoE1-F  | CTTGACAACCTAGGTACGAAGGTA                              |
| DelFMtoE1-R  | TCTGTGCCCCAGTTTGCTA                                   |
| ICD-F        | AAAAAAAAAAAAAAAAAAGGGTCGGCATGGCATC                    |
| ICD-R        | GTCTCACGCAGCCATACGGTTCACTAAACG                        |
| Chik-F       | CGTTTAGTGAACCGTATGGCTGCGTGAGAC                        |
| Chik-R       | ATGCCATGCCGACCCTTTTTTTTTTTTTTTTTTTTTTTT<br>TTGAAATATT |

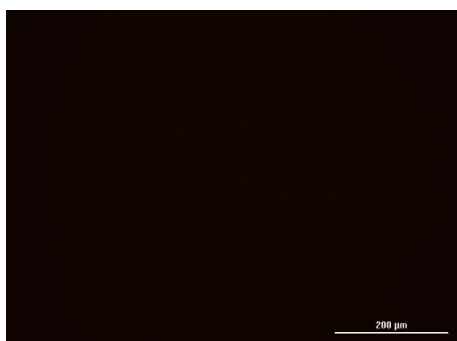

(a)

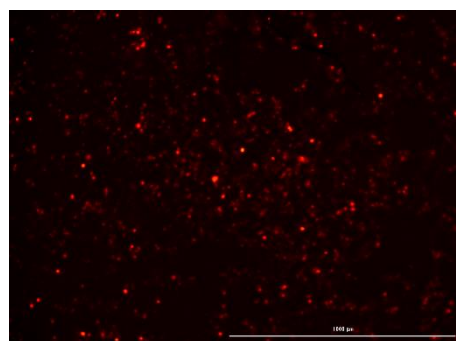

(b)

**Figure S1.** Micrographs of HEK-293T cells transfected in fluorescent field (Texas Red filter) with 1  $\mu$ g of the plasmid: (a) pVax-Rep, bar 200  $\mu$ m; (b) pVax-Help, bar 1000  $\mu$ m.

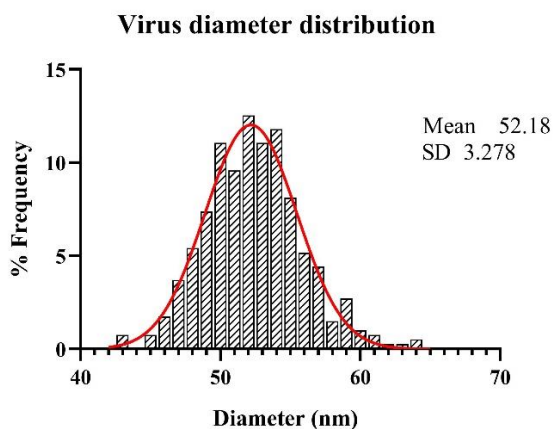

**Figure S2.** Histograms of CHIKV particles diameter distribution measure by transmission electron microscopy.

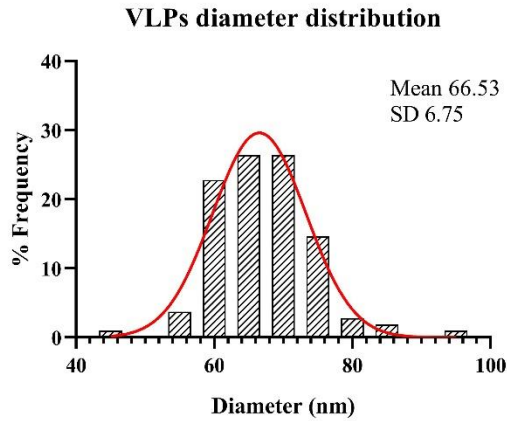

**Figure S3.** Histograms of VLPs diameter distribution measure by transmission electron microscopy.

#### pACNR-CHIKV plasmid sequence

```

ATGGCTGCGTGAGACACACGTAGCCTACCAGTTTCTTACTGCTCTACTCTGCAAAGCAAGAGATTAATAAC
CCATCATGGATTCTGTGTACGTGGACATAGACGCTGACAGCGCCTTTTTGAAGGCCCTGCAACGTGCGTAC
CCCATGTTTGAGGTGGAACCTAGGCAGGTCACATCGAATGACCATGCTAATGCTAGAGCGTTCTCGCATCT
AGCCATAAACTAATAGAGCAGGAAATTGATCCCGACTCAACCATCCTGGATATAGGTAGTGCGCCAGCA
AGGAGGATGATGTCGGACAGGAAGTACCACTGCGTTTGCCCGATGCGCAGCGCAGAAGATCCCGAGAGA
CTCGCTAATTATGCGAGAAAGCTCGCATCTGCCGCAGGAAAAGTCCTGGACAGAAACATTTCTGGAAAGA
TCGGGGACTTACAAGCGGTGATGGCCGTGCCAGACACGGAGACGCCAACATTTTGCTTACACACAGATGT
CTCATGTAGACAGAGAGCAGACGTCGCGATATACCAAGACGTCTATGCTGTACACGCACCCACGTCGCTA
TACCACCAGGCGATTAAAGGAGTCCGAGTGGCGTACTGGGTAGGGTTCGACACAACCCCGTTTCATGTACA
ACGCTATGGCGGGTGCTACCCCTCATACTCGACAAATTGGGCGGATGAGCAGGTACTGAAGGCTAAGAA
CATAGGATTATGTTCAACAGACCTGACGGAAGGTAGACGAGGCAAATTGTCTATCATGAGAGGGAAAAAG
CTAAACCGTGCGACCGTGTGCTGTTCTCAGTAGGGTCAACGCTTTACCCGGAAGCCGCACGCTACTTAA
GAGCTGGCACCTACCATCGGTGTTCCATCTAAAGGGCAAGCTTAGCTTCACATGCCGCTGTGACACAGTGG
TTTCGTGTGAGGGCTACGTCGTTAAGAGAATAACGATGAGCCCAGGCCTTTATGGAAAAACCATAGGGTAT
GCGGTAACCCACCACGCAGACGGATTCTTGATGTGCAAGACTACCGACACGGTTGACGGCGAAAGAGTGT
CATTCTCGGTGTGCACGTACGTGCCGGCGACCATTTGTGATCAAATGACCGGCATCCTTGCTACAGAAGTC
ACGCCGGAGGATGCACAGAAGCTGTTGGTGGGGCTGAACCAGAGGATAGTGGTTAACGGCAGAACGCAA
CGGAACACGAACACCATGAAGAACTACCTACTTCCCGTGGTCGCCCAGGCCTTCAGTAAGTGGGCAAAGG
AGTGCCGGAAGGACATGGAAGATGAGAAGCTTCTGGGGGTGAGAGAAAGAACTAACCTGCTGCTGTCT
ATGGGCATTTAAGAAGCAGAAAACACACACGGTCTACAAGAGGCCTGATACCCAGTCAATCCAGAAGGTT
CAGGCCGAATTTGACAGCTTTGTAGTACCGGGCCTGTGGTCGTCCGGGTTGTCAATCCCGTTGAGGACTAG
AATCAAGTGGTTGTTACGCAAGGTGCCGAAAACAGACCTGATCCCATACAGCGGGAATGCCCAAGAAGCC
CAGGATGCAGAAAAAGAAGCAGAGGAAGAACGAGAAGCAGAACTGACTCATGAGGCTCTACCACCCCTA
CAGGCAGCACAGGAAGATGTCCAGGTGCAAATCGACGTGGAACAGCTTGAGGATAGAGCTGGTGCTGGA
ATAATAGAGACTCCGAGAGGCGCTATCAAAGTTACTGCCCACTAACAGACCACGTCGTGGGGGAGTACC

```

TGGTACTTTCCCCGCAGACCGTACTACGCAGCCAGAAGCTCAGCCTGATCCACGCTTTAGCGGAGCAAGT  
GAAGACGTGTACGCACAGCGGACGAGCAGGGAGGTATGCGGTGGAAGCGTACGATGGCCGAGTCCTAGT  
GCCCTCAGGCTATGCAATTTGCCTGAAGACTTCCAGAGTCTAAGCGAAAGCGCAACGATGGTGTACAAC  
GAAAGAGAGTTTCGTAAACAGAAAAGTTACACCACATTGCGATGCACGGACCAGCCCTGAACACTGACGAA  
GAGTCGTATGAGCTGGTGAGGGCAGAGAGGACAGAACACGAGTACGTCTACGACGTGGACCAGAGAAGA  
TGCTGTAAGAAGGAAGAAGCTGCAGGACTGGTACTGGTGGGCGACTTGACTAATCCGCCCTACCACGAAT  
TCGCATACGAAGGGCTAAAAATTCGCCCCGCTGCCCATACAAAATTGCAGTCATAGGAGTCTTCGGGGTA  
CCAGGATCTGGCAAGTCAGCCATTATCAAGAACCTAGTTACCAGGCAAGACCTGGTGACTAGCGGAAAGA  
AAGAAAAGTCCAAGAAATCAGCACCGACGTGATGAGACAGAGAGGTCTAGAGATATCTGCACGTACGG  
TAGATTCGCTGCTCTTGAATGGATGCAACAGACCAGTCGACGTGTTGTACGTAGACGAGGCGTTTTCGTGC  
CACTCTGGAACGTTACTTGCTTTGATCGCCTTGGTGAGACCAAGACAGAAAAGTTGTACTTTGTGGTGACCC  
GAAGCAGTGCGGCTTCTTCAATATGATGCAGATGAAAGTCAACTACAATCATAACATCTGCACCCAAGTGT  
ACCACAAAAGTATCTCCAGGCGGTGTACACTGCCTGTGACTGCCATTGTGTCATCGTTGCATTACGAAGGC  
AAAATGCGCACTACGAATGAGTACAACATGCCGATTGTAGTGGACACTACAGGCTCAACGAAACCTGACC  
CTGGAGACCTCGTGTTAACGTGCTTCAGAGGGTGGGTAAACAAGTCAAATTGACTATCGTGGACACGA  
GGTCATGACAGCAGCCGCATCCCAAGGGTAACTAGAAAAGGAGTTTACGCAGTTAGGCAAAAAGTTAAC  
GAAAACCCACTCTATGCATCAACATCAGAGCACGTCAACGTACTCCTAACGCGTACGGAAGGTAAACTGG  
TATGGAAGACACTCTCTGGTGACCCGTGGATAAAGACGCTGCAGAACCCACCGAAAGGAAACTTCAAAGC  
AACTATTAAGGAGTGGGAGGTGGAGCACGCATCGATAATGGCGGGCATCTGCAGTCACCAAGTGACCTTT  
GACACATTCCAAAACAAAGCCAACGTTTGCTGGGCTAAGAGCTTGGTCCCTATCCTCGAAACAGCGGGGA  
TAAAACTAAATGATAGGCAGTGGTCCCAGATAATTCAAGCCTTCAAAGAAGACAAAGCATACTACCCGA  
AGTAGCCCTGAATGAAATATGCACGCGCATGTATGGGGTGGATCTAGACAGTGGGCTATTCTCTAAACCGT  
TGGTATCTGTGTATTACGCGGATAACCATTGGGATAATAGGCCGGGAGGAAAGATGTTTCGGATTCAACCCT  
GAGGCAGCGTCCATTCTAGAAAAGAAAGTACCCATTACAAAAGGAAAGTGGAACATCAACAAGCAGATCT  
GCGTGACTACCAGGAGGATAGAAGACTTCAACCCTACCACCAACATTATACCGGTCAACAGGAGACTACC  
ACACTCATTAGTGGCCGAACACCGCCCAGTAAAAGGGGAAAGAATGGAATGGCTGGTTAACAAGATAAA  
CGGACACCACGTACTCCTGGTTAGCGGCTATAACCTTGCCTACTAAGAGAGTCACCTGGGTAGCGC  
CACTAGGTGTCCGCGGAGCGGACTATACATAAACCTAGAGCTGGGTCTACCAGCAACACTTGGTAGGTA  
TGACCTAGTGGTCATAAACATCCACACACCTTTTCGCATACACCATTACCAACAGTGCGTAGATCACGCAA  
TGAAACTGCAAATGCTAGGGGGTGAAGTCACTGAGACTGCTCAAACCGGGTGGCTCTCTATTGATCAGAGC  
ATACGGTTACGCAGATAGAACCAGTGAACGAGTCATCTGCGTACTGGGACGCAAGTTTAGATCGTCTAGA  
GCATTGAAACCACCATGTGTCACCAGTAATACTGAGATGTTTTCTATTAGCAATTTTGACAATGGCAGA  
AGGAATTTTACAACGCATGTCATGAACAATCAACTGAATGCAGCCTTTGTAGGACAGGCCACCCGAGCAG  
GATGTGCACCATCGTACCGGGTAAAACGCATGGACATCGCGAAGAACGATGAAGAGTGCGTGGTTAACG  
CCGCCAACCTCGCGGGTACCAGGTGACGGTGTTTGCAAGGCAGTATATAAAAAGTGGCCGGAGTCCTT  
TAAAAACAGTGAACACCAGTAGGAACCGCAAAAACAGTTATGTGCGGTACGTATCCAGTAATCCACGCC  
GTAGGACCAAACCTTCTCAAATTATTCGGAGTCTGAAGGGGACCGGAATTGGCGGCTGCCTATCGAGAAG  
TCGCAAAGGAAGTAAGTACTGAGTGGGAGTAAATAGCGTAGCTATACCTCTCCTCTCCACAGGTGTATACTCA  
GGAGGGAAAGACAGGCTAACCCAGTCACTGAACCACCTCTTACAGCCATGGACTCGACGGATGCAGAC  
GTGGTCATCTACTGCCGAGACAAGGAATGGGAGAAGAAAAATCTGAGGCCATACAGATGCGGACCCAA  
GTGGAGCTGCTGGATGAGCACATCTCCATAGACTGCGATGTCATTGCGGTGCACCCTGACAGTAGCTTGGC  
AGGCAGAAAAGGATACAGCACCGGAAGGCGCACTGTATTCATATCTAGAAGGGACACGTTTTACACAG  
ACGGCAGTGGATATGGCAGAGATATACACTATGTGGCCAAAGCAACAGAGGCCAATGAGCAAGTCTGC  
CTATATGCCCTGGGGGAAAGTATTGAATCAATCAGGCAGAAATGCCCGGTGGATGATGCAGACGCATCAT  
CTCCCCGAAAAGTGTCCCGTGTCTTGCCGGTATGCCATGACTCCTGAACGCGTCACCCGACTTCGCATG

AACCATGTCACAAATATAATTGTGTGTTCTTCATTTCCCCTTCCAAAGTACAAGATAGAAGGAGTGCAAAAA  
GTCAAATGCTCCAAGGTAATGTTATTCGATCACAATGTGCCATCGCGCGTAAGTCCAAGGGAATACAGATC  
TTCCCAGGAGTCTGTACAGGAAGTGAGTACGACAACGTCATTGACGCATAGCCAGTTTGATCTAAGCGCC  
GATGGCGAGACACTGCCTGTCCCGTCAGACCTGGATGCTGACGCCCCAGCCCTAGAACC GGCCCTAGACG  
ACGGGGCGGTACATACATTACCAACCATAATCGGAAACCTTGC GGCCGTGTCTGACTGGGTAATGAGCAC  
CGTACCTGTGCGCGCCGCCTAGAAGAAGGAGAGGGAGAAACCTGACTGTGACATGTGACGAGAGAGAAGG  
GAATATAACACCCATGGCTAGCGTCCGATTCTTTAGAGCAGAGCTGTGTCCGGCCGTACAAGAAACAGCG  
GAGACGCGTGACACAGCTATTTCCCTTCAGGCACCGCCAAGTACCACCATGGAAGT GAGCCATCCACCGA  
TCTCCTTCGGAGACCAAGCGAGACGTTCCCCATCACATTTGGGGACTTCGACGAAGGAGAAATCGAAAG  
CTTGCTTCTGAGCTACTAAGTTTCGGAGACTTCTACCCGGTGAAGTGGATGATCTGACAGATAGCGACT  
GGTCCACGTGCCCAGACACGGACGACGAGTTATGACTAGACAGGGCAGGTGGGTATATATTCTCGTCGGA  
CACTGGTCCAGGCCATTTACAACAGAAGTCGGTACGCCAGTCAGTGCTGCCGGTAAACACCCTGGAGGAA  
GTCCACGAGGAGAAGTGTTACCCACCTAAGCTGGATGAATTAAGGAGCAACTACTACTTAAGAACTCC  
AGGAGAGTGCCTCATGGCCAATAGAAGCAGGTATCAGTCACGCAAAGTGGAAAATATGAAAGCAACAA  
TCATCCAGAGACTAAAGAGAGGCTGTAAACTGTATTTAATGGCAGAGACCCCCGAAAGTCCCGACTTATCG  
GACCATATACCCGGCGCCTGTGTACTCGCCTCCGATCAATGTCCGATTGTCCAACCCCGAGTCCGCAGTGG  
CAGCATGTAATGAGTTCTTAGCTAGAACTACCCAAGTGTTCATCATACCAAATCACCGACGAGTATGAT  
GCATATCTAGACATGGTGGACGGGTCGGAGAGTTGCTTGGACCGAGCGACATTCAATCCGTCAAACTTA  
GGAGCTACCCGAAACAACATGCTTATCACGCGCCTTCTATCAGAAGCGCTGTACCTTCCCCATTCCAGAAC  
ACACTACAGAATGTACTGGCAGCAGCCACGAAAAGGAACTGCAACGTCACACAGATGAGGGAATTACCC  
ACTTTGGACTCAGCAGTATTCAACGTGGAGTGTTTTAAAAAATTCGCATGTAACCGAGAATACTGGGAAGA  
ATTTGCAGCCAGCCCTATCAGGATAACAAGTGAATCTAACAACCTATGTCACTAACTAAAGGGGCCAA  
AAGCAGCAGCGCTGTTTGCAAAAACCCATAATCTGCTGCCACTGCAGGATGTACCAATGGATAGGTTACA  
GTAGATATGAAAAGGGATGTGAAGGTAACCTCTGGTACAAAGCATACAGAGGAAAGACCTAAGGTGCAG  
GTTATACAGGCGGCTGAACCTTGGCAACAGCGTACCTATGTGGAATTCACAGAGAACTGGTTAGGAGAT  
TGAACGCCGTCCTCTACCCAATGTGCATACACTATTTGACATGTCTGCCGAGGACTTCGATGCCATTATAG  
CCGCACACTTCAAGCCAGGAGACGCTGTTTTAGAAACGGACATAGCCTCCTTTGATAAGAGCCAAGATGAT  
TCACTTGCGCTTACCGCCTTAATGCTGTTAGAAGATTTGGGAGTGGATCACTCCCTGTTGGACTTGATAGAG  
GCTGCTTTCGGAGAGATTTCCAGCTGTCATCTGCCGACAGGTACGCGCTTCAAGTTCGGCGCTATGATGAA  
ATCCGGTATGTTCTAACTCTGTTCTGTAACACGTTGTTAAATATCACCATCGCTAGCCGGGTGTTGGAAGA  
TCGTCTGACAAAATCCGCATGCGCGGCCTTCATCGGCGACGACAACATAATACATGGTGTCTGCTCCGATG  
AATTGATGGCAGCCAGATGCGCTACTTGGATGAACATGGAAGTGAAGATCATAGATGCAGTTGTATCCCA  
GAAAGCTCCTTACTTTTGTGGAGGGTTTATACTGCATGATACTGTGACAGGAACAGCTTGCAGAGTGGCGG  
ACCCGCTAAAAAGGTTATTTAAATTGGGCAAACCGTTAGCGGCAGGTGACGAACAAGATGAAGACAGAAG  
ACGGGCGCTGGCTGATGAAGTAATCAGATGGCAACGAACAGGGCTAATAGATGAGCTGGAGAAAGCGGT  
GTACTCTAGGTACGAAGTGCAGGGTATATCAGTTGCGGTAATGTCCATGGCCACCTTTGCAAGCTCCAGAT  
CCAAGTTCGAGAAGCTCAGAGGACCCGTCATAACTTTGTACGGCGGTCCTAAATAGGTACGCACTACAGCT  
ACCTATTTTGAGAAGCCGACAGCAGGTACCTAAATACCAATCAGCCATAATGGAGTTTATCCCAACCCAA  
ACTTTCTACAATAGGAGGTACCAGCCTCGACCTTGACTCCGCGCCCTACTATCCAAGTTATCAGACCCAG  
ACCGGTCCGCAAAGGAAAGCCGGGCAACTTGCCAGCTGATCTCAGCAGTTAATAAACTGACAATGCGC  
GCGGTACCTCAACAGAAGCCGCGCAAGAATCGGAAGAATAAGAAGCAAAAGCAAAAGCAGCAGGCGCC  
ACGAAACAACATGAATCAAAAGAAGCAGCCCCCTAAAAAGAAACCGGCTCAAAAGAAAAAGAAGCCGGG  
CCGTAGAGAGAGAATGTGCATGAAAATCGAAAATGATTGCATCTTGAAGTCAAGCATGAAGGTAAGGTA  
ACAGGTTACGCGTGCTTGGTAGGGGACAAAGTAATGAAGCCAGCACACGTAAAGGGGACCATCGATAAT  
GCGGACCTGGCCAAATTGGCCTTCAAGCGGTATCTAAGTACGACCTTGAATGCGCGCAGATACCCGTGC

ACATGAAGTCCGACGCTTCGAAGTTCACCCATGAGAAACCGGAGGGGTACTACAACCTGGCACCACGGAG  
CAGTACAGTACTCAGGAGGCCGGTTCACCATCCCTACAGGTGCGGGCAAACCAGGGGACAGCGGTAGAC  
CGATCTTCGACAACAAGGGGCGCGTGGTGGCCATAGTTTTAGGAGGAGCTAATGAAGGAGCCCGTACAGC  
CCTCTCGGTGGTGACCTGGAACAAAGACATCGTCACGAAAATCACCCCTGAGGGGGCCGAAGAGTGGAG  
TCTTGCCATTatggtgagcgagctgattaaggagaacatgcatgaagctgtacatggagggcaccgtgaacaaccaccactcaa  
gtgcacatccgagggcgaggcaagccctacgagggcaccagaccatgagaatcaaggcggtcgagggcgccctctcccttcgcc  
ttcgacatcctggctaccagcttcatgtacggcagcaaaccttcatcaaccacaccagggcatccccgacttctttaagcagtccttccccg  
agggcttcacatgggagagagtcaccacatacgaagacggggcggtgctgaccgtaccaggacaccagcctccaggacggctgcct  
catctacaacgtcaagatcagaggggtgaacttcccatccaacggccctgtgatgcagaagaaaactcggtgggagggcctccaccga  
gacctgtaccccgctgacggcggtggaaggcagagccgacatggccctgaagctcggtggcgggggccacctgatctgcaacttg  
aagaccacatacagatccaagaaaccgctaagaacctcaagatgccggcgcttactatgtggacagaagactggaaagaatcaagga  
ggccgacaaagagacctacgtcgagcagcagaggtggctgtggccagatactcgacacctccctagcaaaactggggcacagaaacttg  
acctacttaagttggcgggagacgttgagtccaacctggggcccAGTCTTGCCATTCCAGTTATGTGCCTGCTGGCAAATA  
CCACGTTCCCCTGCTCCCAGCCCCCTTGACACCCCTGCTGCTACGAAAAAGAGCCGGAGAAAACCCCTGCG  
CATGCTAGAAGACAACGTCATGAGCCCCGGGTACTATCAGCTGCTACAAGCATCCTTAACATGTTCTCCCC  
GCCGCCAGCGACGCGAGTATTAAGGACAACCTCAATGTCTATAAAGCCATAAGACCGTACCTAGCTCACTGT  
CCCGACTGTGGAGAAGGGCACTCGTGCCATAGTCCCGTAGCGCTAGAACGCATCAGAAACGAAGCGACA  
GACGGGACGCTGAAAATCCAGGTTTCCTTGCAAATCGGAATAAAGACGGATGATAGCCATGATTGGACCA  
AGCTGCGTTACATGGACAATCATATGCCAGCAGACGCAGAGAGGGCCAGGCTATTTGTAAGAACGTCAGC  
ACCGTGACGATTACTGGAACAATGGGACACTTCATCCTGGCCCCGATGTCCGAAAGGAGAAACTCTGACG  
GTGGGATTCACTGACGGTAGGAAGATCAGTCACTCATGTACGCACCCATTTACCACGACCCTCCTGTGAT  
AGGCCGGGAAAAATTTCACTCCCGACCCGAGCAGCGGTAGAGAACTACCTTGACGACGTACGCGCAGAGC  
ACCGCTGCAACTGCCGAGGAGATAGAGGTACATATGCCCCCAGACACCCAGATCGCACATTGATGTCAC  
AACAGTCCGGTAATGTAAAGATCACAGTCAATAGTCAGACGGTGCGGTACAAGTGTAAATTGCGGTGACTC  
AAATGAAGGACTAACCACTACAGACAAAGTGATTAATAACTGCAAGGTTGATCAATGCCATGCCGCGGTC  
ACCAATCACAAAAAATGGCAGTATAATTCCCCTCTGGTCCCGCGTAATGCTGAACTCGGGGACCGAAAAG  
GAAAAGTTCACATTCCGTTTCTCTGGCAAATGTGACATGCAGGGTGCTAAGGCAAGGAACCCACCGT  
GACGTACGGAAAAAACCAAGTCATCATGCTGCTGTATCCTGACCACCAACGCTCCTGTCTACCGGAATA  
TGGGAGAAGAACCAAACTATCAAGAAGAGTGGGTGACGCATAAGAAGGAGATCAGGTTAACCGTGCCGA  
CTGAAGGGCTCGAGGTCACGTGGGGCAACAACGAGCCGTACAAGTATTGGCCGCAATTATCCACAAACG  
GTACAGCCCACGGCCACCCGCATGAGATAATTTGTATTATTATGAGCTGTACCCTACTATGACTGTGGTAG  
TTGTGTCAGTGGCCTCGTTCGTACTCCTGTGATGGTGGGTGTGGCAGTGGGGATGTGCATGTGTGCACGA  
CGCAGATGCATTACACCGTACGAACTGACACCAGGAGCTACCGTCCCTTTCTGCTTAGCCTAATATGCTG  
CATTAGAACAGCTAAAGCGGCCACATACCAAGAGGCTGCGGTATACCTGTGGAACGAGCAGCAGCCTTTG  
TTTTGGCTGCAAGCCCTTATTCCGCTGGCAGCCCTGATTGTCCTATGCAACTGTCTGAGACTCTTACCATGC  
TTTTGTAAAACGTTGACTTTTTTAGCCGTAATGAGCGTCGGTGCCACACTGTGAGCGCGTACGAACACGT  
AACAGTGATCCCGAACACGGTGAGTACCGTATAAGACTCTAGTCAACAGACCGGGCTACAGCCCCATG  
GTACTGGAGATGGAGCTTCTGTCACTCACTTTGGAGCCAACGCTATCGCTTGATTACATCACGTGCGAGTA  
TAAAACCGTCATCCCGTCTCCGTACGTGAAATGCTGCGGTACAGCAGAGTGCAAGGACAAGAGCCTACCT  
GATTACAGCTGTAAGGTCTTACCGGCGTCTACCCATTATGTGGGGCGGCGCCTACTGCTTCTGCGACAC  
TGAAAAATACGCAATTGAGCGAAGCACATGTGGAGAAGTCCGAATCATGCAAAACAGAATTTGCATCAGCA  
TATAGGGCTCATACCGCATCCGCATCAGCTAAGCTCCGCGTCTTTACCAAGGAATAATGTTACTGTATCT  
GCTTATGCAAACGGCGATCATGCCGTACAGTTAAGGACGCTAAATTCATTGTGGGGCCAATGTCTTCAGC  
CTGGACACCTTTTGACAATAAAATCGTGGTGTACAAAGGCGACGTCTACAACATGGACTACCCGCCCTTCG  
GCGCAGGAAGACCAGGACAATTTGGCGACATCCAAGTCGCACGCCTGAGAGCGAAGACGTCTATGCTA

ACACACAACTGGTACTGCAGAGACCGTCCGCGGGTACGGTGACGTGCCGTACTCTCAGGCACCATCTGG  
CTTCAAGTATTGGCTAAAAGAACGAGGGGCGTCGCTGCAGCACACAGCACCATTGGCTGTCAAATAGCA  
ACAAACCCGGTAAGAGCGATGAACTGCGCCGTAGGGAACATGCCTATCTCCATCGACATACCGGACGCGG  
CCTTCACTAGGGTCGTCGACGCGCCATCTTTAACGGACATGTCGTGTGAGGTACCAGCCTGCACCCACTCC  
TCAGACTTTGGGGGCGTAGCCATCATTAAATATGCAGCCAGCAAGAAAGGCAAGTGTGCGGTGCATTCTGA  
TGACTAACGCCGTCCTACTATTCGGGAAGCTGAAATAGAAGTAGAAGGGAAGTCTCAGTTGCAAATCTCTTTT  
TCGACGGCCCTAGCCAGCGCCGAATTCCGCGTACAAGTCTGTTCTACACAAGTACACTGTGCAGCCGAGT  
GCCATCCACCGAAAGACCATATAGTCAATTACCCGGCGTCACACACCACCCTCGGGGTCCAAGACATTTCC  
GTTACGGCGATGTCATGGGTGCAGAAGATCACGGGAGGTGTGGGACTGGTTGTCGCTGTTGCAGCACTGA  
TCCTAATCGTGGTGCTATGCGTGTGCTTTAGCAGGCACTAAGTACAACTAGGTACGAAGGTATATGTGT  
CCCCTAAGAGACACACCACATATAGCTAAGAATCAATAGATAAGTATAGATCAAAGGGCTGAACAACCCC  
TGAATAGTAACAAAATATAAAAATCAACAAAAATCATAAAATAGAAAACCAGAAACAGAAGTAGGTAAGA  
AGGTATATGTGTCCCCTAAGAGACACACCATATATAGCTAAGAATCAATAGATAAGTATAGATCAAAGGGC  
TGAATAACCCCTGAATAATAACAAAATATAAAAATCAATAAAAATCATAAAATAGAAAACCATAAACAGAA  
GTAGTTCAAAGGGCTATAAAACCCCTGAAAAGTAACAAAACATAAACTAATAAAAAATCAAATGAATACC  
ATAATTGGCAATCGGAAGAGATGTAGGTACTTAAGCTTCCTAAAAGCAGCCGAAGTCTGCTTTGAGATGTAG  
GCGTAGCACACCGAAGTCTTCATAATTCTCCGAACCCACAGGGACGTAGGAGATGTTCAAAGTGGCTATA  
AAACCCCTGAACAGTAATAAAACATAAAATTAATAAGGATCAAATGAGTACCATAATTGGCAAACGGAAGA  
GATGTAGGTACTTAAGCTTCCTAAAAGCAGCCGAAGTCACTTTGAGATGTAGGCATAGCATAACCGAAGTCT  
TCCACAATTCTCCGTACCCATAGGGACGTAGGAGATGTTATTTGTTTTAATATTTCAAAAAAAAAAAAAA  
AAAAAAAAAAAAAagggtcggcatggcatctccacctctcgcggtccgacctgggcatccgaaggaggacgcacgtccactcggat  
ggctaagggagagccacgagctctcgacagatcataatcagccataccacattgtagagggtttacttgcttaaaaaacctccacacctc  
cccctgaacctgaacataaaatgaatgcaattgtgtgttaactgtttattgcagcttataatggttacaataaagcaatagcatcacaat  
ttcacaataaagcattttttcactgcattctagtgtgtgtgttgcctcaactcatcaagataataaaggaaatttttattgcaatagtgtgtt  
ggaattttgtgtctctcactcgggaaggacatatgggagggcaaatcatttaaacatcagaatgagtagtttggtaggttggcaacata  
tgcccatatgaagatatcaggcttcgagcaagacgtttccggtgaatatggctcataacacccctgtattactgtttatgaagcagacagt  
tttattgttcatgatgatataattttatctgtgcaatgtaacatcagagattttgagacacaacgtggctttgtgaataaatcgaactttgtgta  
gttgaaggatcagatcacgcacgttcccgacaacgcagaccgttccgtggcaagcaaaagtcaaaatcaccaactggtccacctacaaca  
aagctctcatcaacgtggtccctcactttctggtggtgatgagggcgattcaggctggtatgagtcagcaacaccttctcagaggga  
gacctcagcgctagcggagtgtatactggcttactatgttggcactgatgaggggtgcagtgaagtgttcatgttggcaggagaaaaag  
gctgcaccggtgctgcagcagaatgtgatacaggatatattccgcttctcgtcactgactcgctacgctcggtcgttcgactgcggcga  
gcggaaatggcttacgaacggggcgagatttctggaagatgccaggaagataacttaacagggaagtgaagggccgcggcaaacg  
cgttttccataggctccgccccctgacaagcatcacgaaatctgacgtcaaactcagtggtggcgaacccgacaggactataaagatac  
caggcggtttccctggcggctccctcgtgcgtctcgttctcgttccgtttaccggtgtcattccgctgttatggccggtttgtctcattc  
cacgcctgacactcagttccgggtaggcagttcgtccaagctggactgtatgcagcaacccccgttcagtcgaccgctgcgccttatcc  
ggtaactatcgtcttgagtccaacccggaagacatgcaaagcaccactggcagcagccactggtaattgatttagaggagtagtcttga  
agtcatgcgcgggtaaggctaaactgaaaggacaagttttgggtgactgcgtcctcaagccagttacctcggttcaaagagttggtagct  
cagagaaccttgaaaaaccgccccctgcaaggcggtttttcgtttcagagcaagagattacgcgcagacaaaacgatctcaagaagatc  
atcttattaaggggtcagcgtcagtggaacgaaactcacgttaagggattttggtcatgagattatcaaaaaggatcttcacctagatcct  
tttaaatataaaatgaagtttaaatcaatctaagatatatgagtaaacttggtctgacagttaccaatgcttaatcagtgaggcacctatctc  
agcgatctgtctatttcgttcatccatagttgctgactccccgtcgtgtagataactacgatacgggaggggcttaccatctgccccagtgct  
gcaatgataccgcgagaccacgctcaccggctccagatttatcagcaataaaccagccagccggaaggggcgagcgcagaagtgtgtcc  
tgcaactttatccgctccatccagcttattaattgttgccgggaagctagagtaagtagttccagtaataagtttgccaacgttgttgcca  
ttgtgcaggcatcgtggtgtcacgctcgtcgtttggtatggcttattcagctccggttcccaacgatcaaggcgagttacatgatccccat  
gttgtgcaaaaaagcggttagctccttcggtcctccgatcgtgtcagaagtaagtggccgcagtggttatcactcatggttatggcagcact

gcataattcttactgtcatgccatccgtaagatgttttctgtgactggtagtactcaaccaagtcattctgagaatagtgtatgcggcgac  
cgagttgctcttgcccggtcaacacgggataataccgcgccacatagcagaactttaaaagtgtcatcattggaaaacgttcttcgggg  
cgaaaactctcaaggatcttaccgctgttgagatccagttcgatgtaaccactcgtgcaccaactgatcttcagcatctttactttcaccagc  
gtttctgggtgagcaaaaacaggaaggcaaaatgccgcaaaaaaggggaataagggcgacacggaaatgttgaatactcatactcttcctt  
ttcaatattattgaagcatttatcagggttattgtctcatgagcggatacatattgaatgtatttagaaaaataaacaataggggttcgcgc  
acatttccccgaaaagtgccacctgacgtgtcgacgcggccgatgtcttacataacttacggtaaatggccgcctggctgaccgccc  
cgacccccgcccattgacgtcaataatgacgtatgttccatagtaacgccaatagggactttccattgacgtcaatgggtggagtatttacg  
gtaaactgccacttggcagtacatcaagtgtatcatatgccaagtacgccccattgacgtcaatgacggtaaattggccgcctggcatta  
tgcccagtagacgttatgggactttcctacttggcagtacatctacgtatttagtcatcgctattaccatggtgatgcggttttggcagtacat  
caatgggcgtggatagcgggttgactcacgggatttccaagtctccacccattgacgtcaatgggagttgttttggcaccaaaatcaac  
gggactttccaaaatgtcgtacaactccgccccattgacgcaaatggcggttaggcgtgtacggtgggaggtctatataagcagagctc  
gttagtgaaccgt

#### pACNR-CHIKV plasmid sequence annotated

| Feature      | Location (nts)   | Orientation with respect<br>the CMV promoter | Type                                                                                                                        |
|--------------|------------------|----------------------------------------------|-----------------------------------------------------------------------------------------------------------------------------|
| 5' UTR       | 1 to 76          | Right                                        | 5' Untranslated region                                                                                                      |
| nsp1         | 77 to 1,681      | Right                                        | CDS – nonstructural protein 1 – 59.5 kDa                                                                                    |
| nsp2         | 1,682 to 4,075   | Right                                        | CDS – nonstructural protein 2 – 89.6 kDa                                                                                    |
| nsp3         | 4,076 to 5,665   | Right                                        | CDS – nonstructural protein 3 – 57.5 kDa                                                                                    |
| nsp4         | 5,666 to 7,501   | Right                                        | CDS – nonstructural protein 3 – 68.2 kDa                                                                                    |
| SG promoter  | 7,472 to 7,504   | Right                                        | Promoter for the subgenomic RNA                                                                                             |
| Capsid       | 7,567 to 8,394   | Right                                        | CDS – capsid protein – 29.6 kDa                                                                                             |
| E3 (partial) | 8,350 to 8,361   | Right                                        | CDS – partial sequence of the E3 chaperone – This allows the correct autoproteolytic cleavage between C and mKate2 – 402 Da |
| mKate2       | 8,362 to 9,057   | Right                                        | CDS – reporter gene mKate2 – 26.1 kDa                                                                                       |
| FMV2         | 9,058 to 9,108   | Right                                        | CDS – Foot and mouse disease virus cleave site to separate mKate 2 from E3.                                                 |
| E3           | 9,109 to 9,300   | Right                                        | CDS – E3 protein – 7.3 kDa                                                                                                  |
| E2           | 9301 to 10,569   | Right                                        | CDS – E2 glycoprotein – 47.5 kDa                                                                                            |
| 6K           | 10,570 to 10,752 | Right                                        | CDS – 6K protein – 6.8 kDa                                                                                                  |

|                       |                  |       |                                                                                 |
|-----------------------|------------------|-------|---------------------------------------------------------------------------------|
| E1                    | 10,752 to 12,072 | Right | CDS – E1glycoprotein – 47.5 kDa                                                 |
| 3' UTR                | 12,073 to 12,822 | Right | 3' Untranslated region that includes the viral polyA                            |
| HDV                   | 12,823 to 12,906 | Right | Hepatitis delta virus ribozyme                                                  |
| SV40 polyA            | 13,032 to 13,147 | Right | Simian vacuolating virus 40 polyadenylation signal and transcription terminator |
| $\beta$ -globin polyA | 13,148 to 13,203 | Right | $\beta$ -globin polyadenylation signal and transcription terminator             |
| p15A ori              | 13,930 to 14,474 | Left  | Origin of replication for <i>E. coli</i>                                        |
| AmpR                  | 14,639 to 15,499 | Left  | Ampicillin resistant gene for selection in <i>E. coli</i> – 31.5 kDa            |
| AmpR promoter         | 15,500 to 15,604 | Left  | <i>E. coli</i> promoter for AmpR                                                |
| CMV enhancer          | 15,653 to 15,956 | Right | Enhancer for the Cytomegalovirus promoter for mammalian cell lines.             |
| CMV promoter          | 15,957 to 16,169 | Right | Cytomegalovirus transcription promoter for mammalian cell lines.                |

### pACNR-CHIKV plasmid map



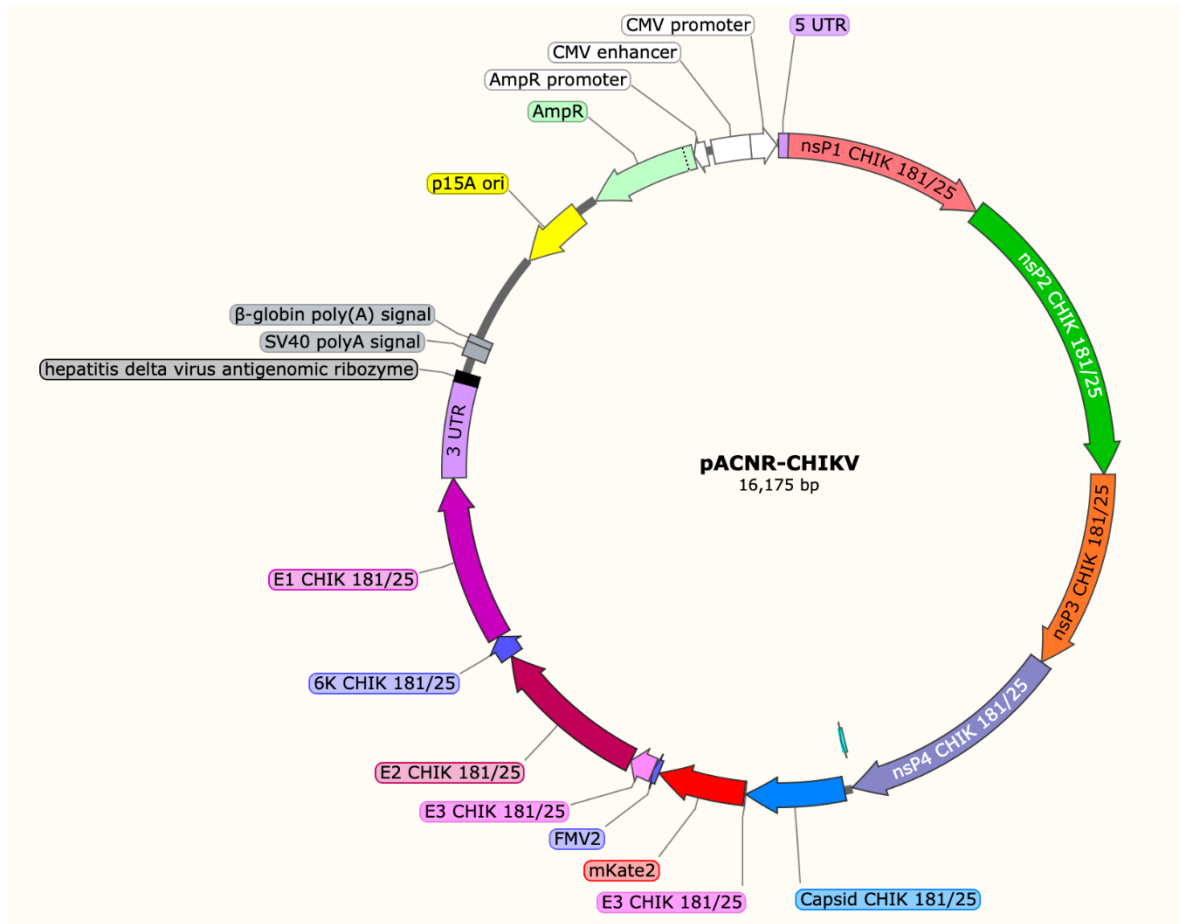

### pACNR-Rep plasmid sequence

ATGGCTGCGTGAGACACACGTAGCCTACCAGTTTCTTACTGCTCTACTCTGCAAAGCAAGAGATTAATAAC  
 CCATCATGGATTCTGTGTACGTGGACATAGACGCTGACAGCGCCTTTTTGAAGGCCCTGCAACGTGCGTAC  
 CCCATGTTTGAGGTGGAACCTAGGCAGGTCACATCGAATGACCATGCTAATGCTAGAGCGTTCTCGCATCT  
 AGCCATAAACTAATAGAGCAGGAAATTGATCCCGACTCAACCATCCTGGATATAGGTAGTGCGCCAGCA  
 AGGAGGATGATGTCGGACAGGAAGTACCACTGCGTTTGCCGATGCGCAGCGCAGAAGATCCCGAGAGA  
 CTCGCTAATTATGCGAGAAAAGCTCGCATCTGCCGACAGGAAAAGTCCTGGACAGAAACATTCTGGAAAGA  
 TCGGGGACTTACAAGCGGTGATGGCCGTGCCAGACACGGAGACGCCAACATTTTGCTTACACACAGATGT  
 CTCATGTAGACAGAGACGACGTCGCGATATACCAAGACGTCTATGCTGTACACGCACCCACGTCGCTA  
 TACCACCAGGCGATTAAAGGAGTCCGAGTGGCGTACTGGGTAGGGTTCGACACAACCCCGTTTCATGTACA  
 ACGCTATGGCGGGTGCTACCCCTCATACTCGACAAATTGGGCGGATGAGCAGGTAAGGCTAAGAA  
 CATAGGATTATGTTCAACAGACCTGACGGAAGGTAGACGAGGCAAATTGTCTATCATGAGAGGGAAAAAG  
 CTAACACCGTGCGACCGTGTGCTGTTCTCAGTAGGGTCAACGCTTTACCCGGAAGCCGCACGCTACTTAA  
 GAGCTGGCACCTACCATCGGTGTTCCATCTAAAGGGCAAGCTTAGCTTCACATGCCGCTGTGACACAGTGG  
 TTTCGTGTGAGGGCTACGTCGTTAAGAGAATAACGATGAGCCAGGCCTTTATGGAAAAACCATAGGGTAT  
 GCGGTAACCCACCACGCAGACGGATTCTTGATGTGCAAGACTACCGACACGTTGACGGCGAAAGAGTGT  
 CATTCTCGGTGTGCACGTACGTGCCGGCGACCATTTGTGATCAAATGACCGGCATCCTTGCTACAGAAGTC  
 ACGCCGGAGGATGCACAGAAGCTGTTGGTGGGGCTGAACCAGAGGATAGTGGTTAACGGCAGAACGCAA  
 CGGAACACGAACACCATGAAGAACTACCTACTTCCCGTGGTGCAGGCCTTCAGTAAGTGGGCAAAGG

AGTGCCGGAAGGACATGGAAGATGAGAAGCTTCTGGGGGTCAGAGAAAGAACTAACCTGCTGCTGTCT  
ATGGGCATTTAAGAAGCAGAAAAACACACGGTCTACAAGAGGCCTGATACCCAGTCAATCCAGAAGGTT  
CAGGCCGAATTTGACAGCTTTGTAGTACCGGGCCTGTGGTCGTCCGGGTTGTCAATCCCGTTGAGGACTAG  
AATCAAGTGTTGTACGCAAGGTGCCGAAAACAGACCTGATCCCATACAGCGGGAATGCCCAAGAAGCC  
CAGGATGCAGAAAAAGAAGCAGAGGAAGAACGAGAAGCAGAACTGACTCATGAGGCTCTACCAACCCCTA  
CAGGCAGCACAGGAAGATGTCCAGGTGCAAATCGACGTGGAACAGCTTGAGGATAGAGCTGGTGCTGGA  
ATAATAGAGACTCCGAGAGGCGCTATCAAAGTTACTGCCCACTAACAGACCACGTCTGGGGGAGTACC  
TGGTACTTTCCCCGCAGACCGTACTACGCAGCCAGAAGCTCAGCCTGATCCACGCTTTAGCGGAGCAAGT  
GAAGACGTGTACGCACAGCGGACGAGCAGGGAGGTATGCGGTGCAAGCGTACGATGGCCGAGTCCTAGT  
GCCCTCAGGCTATGCAATTTGCCTGAAGACTTCCAGAGTCTAAGCGAAAGCGCAACGATGGTGTACAAC  
GAAAGAGAGTTCGTAAACAGAAAAGTTACACCACATTGCGATGCACGGACCAGCCCTGAACACTGACGAA  
GAGTCGTATGAGCTGGTGAGGGCAGAGAGGACAGAACACGAGTACGTCTACGACGTGGACCAGAGAAGA  
TGCTGTAAGAAGGAAGAAGCTGCAGGACTGGTACTGGTGGGCGACTTGACTAATCCGCCCTACCACGAAT  
TCGCATACGAAGGGCTAAAAATTCGCCCCGCTGCCCATACAAAATTGCAGTCATAGGAGTCTTCGGGGTA  
CCAGGATCTGGCAAGTCAGCCATTATCAAGAACCTAGTTACCAGGCAAGACCTGGTGACTAGCGGAAAGA  
AAGAAAACCTGCCAAGAAATCAGCACCGACGTGATGAGACAGAGAGGTCTAGAGATATCTGCACGTACGG  
TAGATTCGCTGCTCTTGAATGGATGCAACAGACCAGTCGACGTGTTGTACGTAGACGAGGCGTTTGCCTGC  
CACTCTGGAACGTTACTTGCTTTGATCGCCTTGGTGAGACCAAGACAGAAAAGTTGACTTTGTGGTGACCC  
GAAGCAGTGCGGCTTCTTCAATATGATGCAGATGAAAGTCAACTACAATCATAACATCTGCACCCAAGTGT  
ACCACAAAAGTATCTCCAGGCGGTGTACACTGCCTGTGACTGCCATTGTGTATCGTTGCATTACGAAGGC  
AAAATGCGCACTACGAATGAGTACAACATGCCGATTGTAGTGGACACTACAGGCTCAACGAAACCTGACC  
CTGGAGACCTCGTGTTAACGTGCTTCAGAGGGTGGGTTAAACAACCTGCAAATTGACTATCGTGGACACGA  
GGTCATGACAGCAGCCGCATCCCAAGGGTAACTAGAAAAGGAGTTTACGCAGTTAGGCAAAAAGTTAAC  
GAAAACCCACTCTATGCATCAACATCAGAGCACGTCAACGTACTCCTAACGCGTACGGAAGGTAAACTGG  
TATGGAAGACACTCTCTGGTGACCCGTGGATAAAGACGCTGCAGAACCCACCGAAAGGAAACTTCAAAGC  
AACTATTAAGGAGTGGGAGGTGGAGCACGCATCGATAATGGCGGGCATCTGCAGTCACCAAGTGACCTTT  
GACACATTCCAAAACAAAGCCAACGTTTGCTGGGCTAAGAGCTTGGTCCCTATCCTCGAAACAGCGGGGA  
TAAAACTAAATGATAGGCAGTGGTCCCAGATAATTCAAGCCTTCAAAGAAGACAAAGCATACTCACCCGA  
AGTAGCCCTGAATGAAATATGCACGCGCATGTATGGGGTGGATCTAGACAGTGGGCTATTCTCTAAACCGT  
TGGTATCTGTGTATTACGCGGATAACCATTGGGATAATAGGCCGGGAGGAAAGATGTTCCGATTCAACCT  
GAGGCAGCGTCCATTCTAGAAAGAAAGTACCCATTTACAAAAGGAAAGTGGAACATCAACAAGCAGATCT  
GCGTGACTACCAGGAGGATAGAAGACTTCAACCCTACCACCAACATTATACCGGTCAACAGGAGACTACC  
ACACTCATTAGTGCCGAACACCGCCCAGTAAAAGGGGAAAGAATGGAATGGCTGGTTAACAAGATAAA  
CGGACACCACGTACTCCTGGTTAGCGGCTATAACCTTGCACTGCCTACTAAGAGAGTCACCTGGGTAGCGC  
CACTAGGTGTCCGCGGAGCGGACTATACATAAACCTAGAGCTGGGTCTACCAGCAACACTTGGTAGGTA  
TGACCTAGTGGTCATAAACATCCACACACCTTTTCGCATACACCATTACCAACAGTGCGTAGATCACGCAA  
TGAAACTGCAAATGCTAGGGGGTGACTCACTGAGACTGCTCAAACCGGGTGGCTCTCTATTGATCAGAGC  
ATACGGTTACGCAGATAGAACCAGTGAACGAGTCATCTGCGTACTGGGACGCAAGTTTAGATCGTCTAGA  
GCATTGAAACCACCATGTGTACCCAGTAATACTGAGATGTTTTCTATTAGCAATTTTGACAATGGCAGA  
AGGAATTTTACAACGCATGTATGAACAATCACTGAATGCAGCCTTTGTAGGACAGGCCACCCGAGCAG  
GATGTGCACCATCGTACCGGTAAAACGCATGGACATCGCGAAGAACGATGAAGAGTGCCTGGTTAACG  
CCGCCAACCTCGCGGGTACCAGGTGACGGTGTTCGAAGGCAGTATATAAAAAGTGGCCGGAGTCCTT  
TAAAAACAGTGCAACACCAGTAGGAACCGCAAAAACAGTTATGTGCGGTACGTATCCAGTAATCCACGCC  
GTAGGACCAAACCTTCTCAAATTATTCGGAGTCTGAAGGGGACCGGAATTGGCGGCTGCCTATCGAGAAG  
TCGCAAAGGAAGTAAGTACTGAGTGGGAGTAAATAGCGTAGCTATACCTCTCCTCTCCACAGGTGTATACTCA

GGAGGGAAAGACAGGCTAACCCAGTCACTGAACCACCTCTTTACAGCCATGGACTCGACGGATGCAGAC  
GTGGTCATCTACTGCCGAGACAAGGAATGGGAGAAGAAAATATCTGAGGCCATACAGATGCGGACCCAA  
GTGGAGCTGCTGGATGAGCACATCTCCATAGACTGCGATGTCATTTCGCGTGCACCCTGACAGTAGCTTGGC  
AGGCAGAAAAGGATACAGCACCACGGAAGGCGCACTGTATTCATATCTAGAAGGGACACGTTTTACCCAG  
ACGGCAGTGGATATGGCAGAGATATACACTATGTGGCCAAAGCAAACAGAGGCCAATGAGCAAGTCTGC  
CTATATGCCCTGGGGGAAAGTATTGAATCAATCAGGCAGAAATGCCCGGTGGATGATGCAGACGCATCAT  
CTCCCCGAAAAGTGTCCCGTGTCTTTGCCGGTATGCCATGACTCCTGAACGCGTCACCCGACTTCGCATG  
AACCATGTCACAAATATAATTGTGTGTTCTTCATTTCCCTTCCAAAGTACAAGATAGAAGGAGTGCAAAAA  
GTCAAATGCTCCAAGGTAATGTTATTCGATCACAATGTGCCATCGCGCGTAAGTCCAAGGGAATACAGATC  
TTCCAGGAGTCTGTACAGGAAGTGAGTACGACAACGTCATTGACGCATAGCCAGTTTTGATCTAAGCGCC  
GATGGCGAGACACTGCCTGTCCCGTCAGACCTGGATGCTGACGCCCCAGCCCTAGAACC GGCCCTAGACG  
ACGGGGCGGTACATACATTACCAACCATAATCGGAAACCTTGCGGCCGTGTCTGACTGGGTAATGAGCAC  
CGTACCTGTCGCGCCGCCTAGAAGAAGGAGAGGGAGAAACCTGACTGTGACATGTGACGAGAGAGAAGG  
GAATATAACACCCATGGCTAGCGTCCGATTCTTTAGAGCAGAGCTGTGTCCGGCCGTACAAGAAACAGCG  
GAGACGCGTGACACAGCTATTTCCCTTCAGGCACCGCCAAGTACCACCATGGAAGTGAAGCCATCCACCGA  
TCTCCTTCGGAGCACCAAGCGAGACGTTCCCCATCACATTTGGGGACTTCGACGAAGGAGAAATCGAAAG  
CTTGCTTCTGAGCTACTAAGTTCGGAGACTTCTACCCGGTGAAGTGGATGATCTGACAGATAGCGACT  
GGTCCACGTGCCCAGACACGGACGACGAGTTATGACTAGACAGGGCAGGTGGGTATATATTCTCGTCGGA  
CACTGGTCCAGGCCATTTACAACAGAAGTCGGTACGCCAGTCAGTGCTGCCGGTAAACACCCCTGGAGGAA  
GTCCACGAGGAGAAGTGTTACCCACCTAAGCTGGATGAATTAAGGAGCAACTACTACTTAAGAACTCC  
AGGAGAGTGCGTCCATGGCCAATAGAAGCAGGTATCAGTCACGCAAAGTGGAAAAATATGAAAGCAACAA  
TCATCCAGAGACTAAAGAGAGGCTGTAAACTGTATTTAATGGCAGAGACCCCGAAAAGTCCCGACTTATCG  
GACCATATACCCGGCGCCTGTGTACTCGCCTCCGATCAATGTCCGATTGTCCAACCCCGAGTCCGCAGTGG  
CAGCATGTAATGAGTTCTTAGCTAGAACTACCCAACTGTTTCATCATACCAAATCACCGACGAGTATGAT  
GCATATCTAGACATGGTGGACGGGTCGGAGAGTTGCTTGGACCGAGCGACATTCAATCCGTCAAACTTA  
GGAGCTACCCGAAACAACATGCTTATCACGCGCCTTCTATCAGAAGCGCTGTACCTTCCCCATTCCAGAAC  
ACACTACAGAATGTACTGGCAGCAGCCACGAAAAGGAACTGCAACGTCACACAGATGAGGGAATTACCC  
ACTTTGGACTCAGCAGTATTCAACGTGGAGTGTTTTAAAAAATTTCGCATGTAACCGAGAATACTGGGAAGA  
ATTTGCAGCCAGCCCTATCAGGATAACAACCTGAGAATCTAACAACTATGTACTAACTAAAGGGGCCAA  
AAGCAGCAGCGCTGTTTGCAAAAACCCATAATCTGCTGCCACTGCAGGATGTACCAATGGATAGGTTACA  
GTAGATATGAAAAGGGATGTGAAGGTAACCTCTGGTACAAAGCATACAGAGGAAAGACCTAAGGTGCAG  
GTTATACAGGCGGCTGAACCTTGGAACAGCGTACCTATGTGGAATTCACAGAGAACTGGTTAGGAGAT  
TGAACGCCGTCTCTACCCAATGTGCATACACTATTTGACATGTCTGCCGAGGACTTCGATGCCATTATAG  
CCGCACACTTCAAGCCAGGAGACGCTGTTTTAGAAACGGACATAGCCTCCTTTGATAAGAGCCAAGATGAT  
TCACTTGCGCTTACCGCCTTAATGCTGTTAGAAGATTTGGGAGTGGATCACTCCCTGTTGGACTTGATAGAG  
GCTGCTTTGCGAGAGATTTCCAGCTGTCATCTGCCGACAGGTACGCGCTTCAAGTTCGGCGCTATGATGAA  
ATCCGGTATGTTCTAACTCTGTTGTCGAACACGTTGTTAAATATCACCATCGCTAGCCGGGTGTTGGAAGA  
TCGTCTGACAAAATCCGCATGCGCGGCCTTCATCGGCGACGACAACATAATACATGGTGTCTGCTCCGATG  
AATTGATGGCAGCCAGATGCGCTACTTGGATGAACATGGAAGTGAAGATCATAGATGCAGTTGTATCCCA  
GAAAGCTCCTTACTTTTGTGGAGGGTTTATACTGCATGATACTGTGACAGGAACAGCTTGACAGAGTGGCGG  
ACCCGCTAAAAAGGTTATTTAAATTGGGCAAACCGTTAGCGGCAGGTGACGAACAAGATGAAGACAGAAG  
ACGGGCGCTGGCTGATGAAGTAATCAGATGGCAACGAACAGGGCTAATAGATGAGCTGGAGAAAGCGGT  
GACTCTAGGTACGAAGTGCAGGGTATATCAGTTGCGGTAATGTCCATGGCCACCTTTGCAAGCTCCAGAT  
CCAACTTCGAGAAGCTCAGAGGACCCGTCATAACTTTGTACGGCGGTCCTAAATAGGTACGCACTACAGCT  
ACCTATTTTGAGAAGCCGACAGCAGGTACCTAAATACCAATCAGCCATAATGGAGGCCATTATGGTGAG

CGAGctgattaaggagaacatgcacatgaagctgtacatggagggcaccgtgaacaaccaccacttcaagtgcacatccgagggcgaa  
ggcaagccctacgagggcaccagaccatgagaatcaaggcggtcgagggcgccctctccccttcgcttcgacatcctggctaccagc  
ttcatgtacggcagcaaaaccttcatcaaccacaccagggcatccccgacttcttaagcagtccttccccgagggcttcacatgggagaga  
gtcaccacatacgaagacggggcggtgctgacgcctaccaggacaccagcctccaggacggctgcctcatctacaacgtcaagatcaga  
gggggtgaacttccatccaacggccctgtgatgcagaagaaaacactcggctgggaggcctccaccgagacacctgtaccccgctgacgg  
cggcctggaaggcagagccgacatggccctgaagctcgtgggcggggccacctgatctgcaactgaagaccacatacagatccaag  
aaacccgctaagaacctcaagatgcccggcgcttactatgtggacagaagactggaaagaatcaaggaggccgacaaagagacctacgt  
cgagcagcacgaggtggctgtggccagatactgcgacctcccTAGCAAACCTGGGGCACAGACTTGACAACTAGGTACGA  
AGGTATATGTGTCCCCTAAGAGACACACCACATATAGCTAAGAATCAATAGATAAGTATAGATCAAAGGG  
CTGAACAACCCCTGAATAGTAACAAAATATAAAAATCAACAAAATCATAAAATAGAAAACAGAAACAG  
AAGTAGGTAAGAAGGTATATGTGTCCCCTAAGAGACACACCATATATAGCTAAGAATCAATAGATAAGTAT  
AGATCAAAGGGCTGAATAACCCCTGAATAATAACAAAATATAAAAATCAATAAAAATCATAAAATAGAAA  
ACCATAAACAGAAGTAGTTCAAAGGGCTATAAAACCCCTGAAAAGTAACAAAACATAAAACTAATAAAAA  
TCAAATGAATACCATAATTGGCAATCGGAAGAGATGTAGGTACTTAAGCTTCCTAAAAGCAGCCGAACCTCG  
CTTTGAGATGTAGGCGTAGCACACCCGAACCTCTCCATAATTCTCCGAACCCACAGGGACGTAGGAGATGTT  
CAAAGTGGCTATAAAACCCCTGAACAGTAATAAAACATAAAATTAATAAGGATCAAATGAGTACCATAATTG  
GCAAACGGAAGAGATGTAGGTACTTAAGCTTCCTAAAAGCAGCCGAACCTCACTTTGAGATGTAGGCATAG  
CATACCGAACTCTCCACAATTCTCCGTACCCATAGGGACGTAGGAGATGTTATTTTGTTTTAATATTTCAA  
AAAAAAAAAAAAAAAAAAAAAAAAAagggctcgcatggcatctccacctcctcgcggtccgacctgggcatccgaaggaggac  
gcacgtccactcggtatggctaaggagagccacgagctcctcgacagatcataatcagccataccacattttagaggttttacttgcttta  
aaaacctccacacctccccctgaacctgaacataaaatgaatgcaattgtgtgttaactgtttattgcagcttataatggttacaataaa  
gcaatagcatcacaatttcacaaataaagcattttttcactgcattctagtgtgtgtgttccaaactcatcaagataataaaggaaattttt  
cattgcaatagtgtgttgaatttttgtgtctcactcggaaggacatatgggagggcaaatcatttaaacatcagaatgagtatttggtt  
agagtttggaacatatgcccatatgaagatatcaggctcgagcaagacgtttcccggtgaatatggctcataacaccccttgattactgtt  
tatgtaagcagacagttttattgttcatgatgatatttttatctgtgcaatgtaacatcagagattttgagacacaacgtggctttgtgaata  
aatcgaacttttctgagttgaaggatcagatcacgcatctccgacaacgcagaccgttccgtggcaaaagcaaaagtcaaaatcaccaa  
ctggtccacctacaacaaagctctcatcaacgtggctccctcactttctggctggatgatggggcgattcaggcctggtatgagtcaaca  
accttctcacgaggcagacctcagcgctagcggagtgtatactggcttactatgttggcactgatgagggtgtcagtgaagtgtctcatgt  
ggcaggagaaaaaaggctgcaccggtgcgtcagcagaatatgtgatacaggatatattccgcttctcgtcactgactcgctacgctcgg  
tcgttcgactgcggcgagcggaaatggcttacgaacggggcgagatttctggaagatgccaggaagataacttaacagggaagtga  
agggccgcggcaaaagcggttttccataggctccgccccctgacaagcatcacgaaatctgacgtcaaatcagtggtggcaaacccga  
caggactataaagataccaggcggtttccctggcggtccctcgtgcgtctcctgttcccttcggtttaccggtgtcattccgctgttatg  
gccgctgttctcattccacgctgacactcagttccgggtaggcagttcgtccaagctggactgtatgcacgaacccccgttcagtcg  
accgctgcgccttatccggttaactatcgtcttgagtccaacccggaagacatgcaaaagcaccactggcagcagccactggaattgatt  
agaggagttagtcttgaagtcagcgccggttaaggctaaactgaaaggacaagtttggtgactgcgctcctccaagccagttacctcggt  
tcaaagagttggtagctcagagaacctcgaaaaaccgacctgaaggcggtttttcggtttcagagcaagagattacgcgcagacaaaa  
cgatctcaagaagatcatcttattaaggggtctgacgtcagtggaacgaaaactcacgttaagggttttggtcatgagattatcaaaaag  
gatcttcacctagatccttttaataaaaatgaagttttaatcaatctaaagtatatatgagtaaacttggtctgacagttaccaatgcttaac  
agttaggcacctatctcagcgatctgtctatttcgttcatccatagttgctgactccccgtcgtgtagataactacgatacgggagggcctac  
catctggccccagtgctgcaatgataccgcgagacccacgctcaccggctccagatttatcagcaataaacagccagccggaaggggcg  
agcgcagaagtggtcctgcaactttatccgctcatccagcttattaattgttgccgggaagctagagtaagtgttcgacgttaatatgtt  
gcgcaacggtgttgccattgtgcaggcatcgtggtgtcacgctcgtcgtttggtatggcttattcagctccggttccaacgatcaaggcg  
agttacatgatccccatgttgtgcaaaaaagcggttagctcctcggctccgatcgtgtcagaagtaagttggccgagtggttatcactc  
atggttatggcagcactgcataattcttactgtcatgccatccgtaagatgcttttctgtgactggtgagtactcaaccaagtcattctgaga  
atagtgtagcgggcagcgaggttgctcttggccggcgtaacacgggataataccgcgccacatagcagaactttaaagtgctcatcattg

gaaaacgttcttcggggcgaaaactctcaaggatcttaccgctgttgagatccagttcgatgtaaccactcgtgcaccaactgatcttcag  
catcttttactttcaccagcgtttctgggtgagcaaaaacaggaaggcaaaatgccgaaaaaagggaataagggcgacacggaaatgtt  
gaatactcatacttctcttttcaatattattgaagcatttatcaggggtattgtctcatgagcggatacatatttgatgtatttagaaaaataaa  
caaatagggggttcgcgcacatttccccgaaaagtgccacctgacgtgtcgacgcggccgcatgtcgttacataacttacggtaaatggccc  
gcctggctgaccgccaacgacccccgccattgacgtcaataatgacgtatgttcccatagtaacgccaatagggactttccattgacgtca  
atgggtggagattttacggtaaaactgccacttggcagtagcatcaagtgtatcatatgccaagtacgccccctattgacgtcaatgacggtaa  
atggcccgctggcattatgccagtagcatgaccttatgggactttctacttggcagtagcatctacgtattagtcacgtattaccatgggtgac  
gcggttttggcagtagcatcaatggcggtgtagcggttgactcacggggatttccaagtctccacccattgacgtcaatgggagttgtt  
ttggcaccaaaatcaacgggactttccaaaatgtcgtacaactccgccccattgacgcaaatgggcggtaggcgtgtacgggtgggaggt  
ctatataagcagagctcgttttagtaaccgt

### pACNR-CHIKV replicon sequence annotated

| Feature           | Location (nts)      | Orientation with respect<br>the CMV promoter | Type                                                                                  |
|-------------------|---------------------|----------------------------------------------|---------------------------------------------------------------------------------------|
| 5' UTR            | 1 to 76             | Right                                        | 5' Untranslated region                                                                |
| nsp1              | 77 to 1,681         | Right                                        | CDS – nonstructural protein 1 –<br>59.5 kDa                                           |
| nsp2              | 1,682 to 4,075      | Right                                        | CDS – nonstructural protein 2 –<br>89.6 kDa                                           |
| nsp3              | 4,076 to 5,665      | Right                                        | CDS – nonstructural protein 3 –<br>57.5 kDa                                           |
| nsp4              | 5,666 to 7,501      | Right                                        | CDS – nonstructural protein 3 –<br>68.2 kDa                                           |
| SG promoter       | 7,472 to 7,504      | Right                                        | Promoter for the subgenomic<br>RNA                                                    |
| Capsid            | 7,567 to 7,572      | Right                                        | CDS – capsid protein – 2 amino<br>acids – 278 Da                                      |
| E3 (partial)      | 7,573 to 7,578      | Right                                        | CDS –E3 - 2 amino acids – 202 Da                                                      |
| mKate2            | 7,579 to 8,286      | Right                                        | CDS – reporter gene mKate2 –<br>26.4 kDa                                              |
| 3' UTR            | 8,287 to 9,024      | Right                                        | 3' Untranslated region that<br>includes the viral polyA                               |
| HDV               | 9,025 to 9,108      | Right                                        | Hepatitis delta virus ribozyme                                                        |
| SV40 polyA        | 9,234 to 9,349      | Right                                        | Simian vacuolating virus 40<br>polyadenylation signal and<br>transcription terminator |
| β-globin<br>polyA | 9,350 to 9,405      | Right                                        | β-globin polyadenylation signal<br>and transcription terminator                       |
| p15A ori          | 10,132 to<br>10,676 | Left                                         | Origin of replication for <i>E. coli</i>                                              |
| AmpR              | 10,841 to<br>11,701 | Left                                         | Ampicillin resistant gene for<br>selection in <i>E. coli</i> – 31.5 kDa               |
| AmpR<br>promoter  | 11,702 to<br>11,806 | Left                                         | <i>E. coli</i> promoter for AmpR                                                      |

|                 |                     |       |                                                                           |
|-----------------|---------------------|-------|---------------------------------------------------------------------------|
| CMV<br>enhancer | 11,855 to<br>12,158 | Right | Enhancer for the Cytomegalovirus<br>promoter for mammalian cell<br>lines. |
| CMV<br>promoter | 12,159 to<br>12,362 | Right | Cytomegalovirus transcription<br>promoter for mammalian cell<br>lines.    |

pACNR-Rep plasmid map

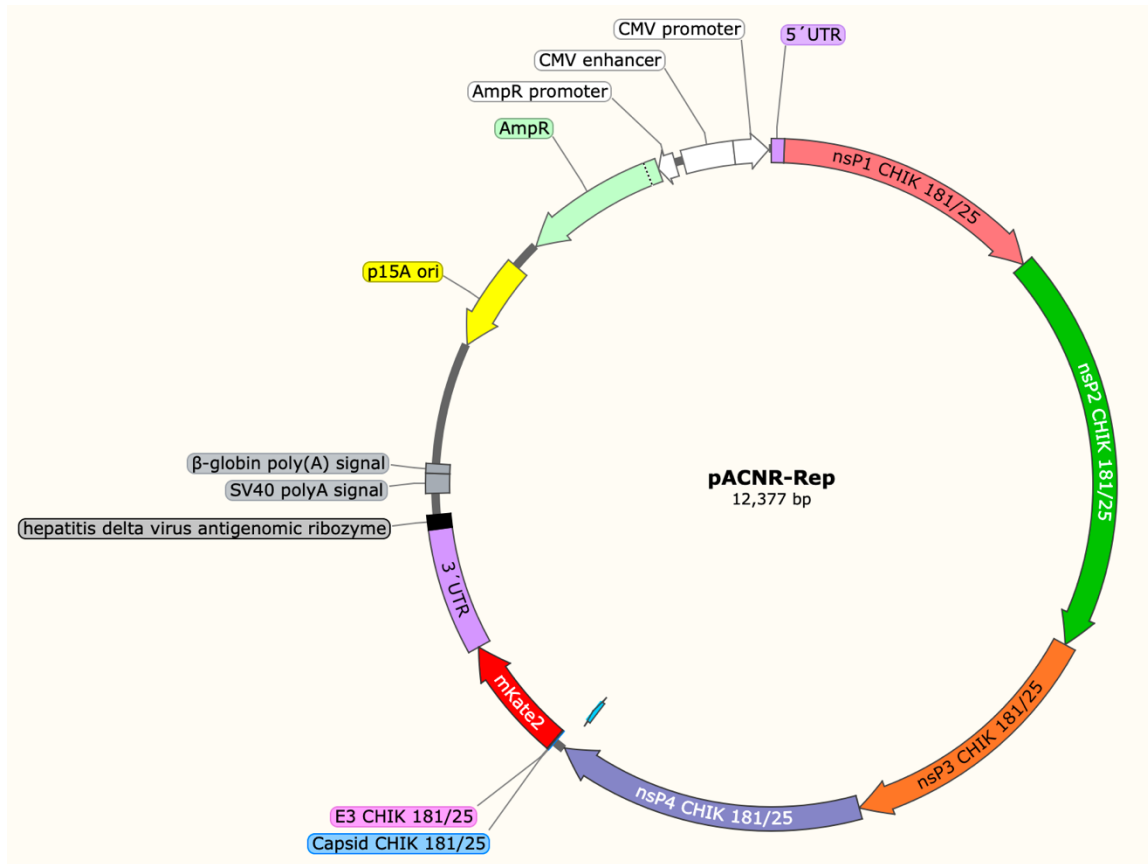

### pVax-Helper plasmid sequence

GTACGCACTACAGCTACCTATTTTGCAGAAGCCGACAGCAGGTACCTAAATACCAATCAGCCATAATGGAG  
 TTTATCCCAACCCAAACTTTCTACAATAGGAGGTACCAGCCTCGACCTTGGACTCCGCGCCCTACTATCCAA  
 GTTATCAGACCCAGACCGCGTCCGCAAAGGAAAGCCGGGCAACTTGCCCAGCTGATCTCAGCAGTTAATA  
 AACTGACAATGCGCGCGGTACCTCAACAGAAGCCGCGCAAGAATCGGAAGAATAAGAAGCAAAAGCAAA  
 AGCAGCAGGCGCCACGAAACAACATGAATCAAAAGAAGCAGCCCCCTAAAAAGAAACCGGCTCAAAAGA  
 AAAAGAAGCCGGGCCGTAGAGAGAGAATGTGCATGAAAATCGAAAATGATTGCATCTTGAAGTCAAGC  
 ATGAAGGTAAGGTAACAGGTTACGCGTGCTTGGTAGGGGACAAAGTAATGAAGCCAGCACACGTAAAGG  
 GGACCATCGATAATGCGGACCTGGCCAAATTGGCCTTCAAGCGGTCATCTAAGTACGACCTTGAATGCGC  
 GCAGATACCCGTGCACATGAAGTCCGACGCTTCAAGTTACCCCATGAGAAACCGGAGGGGTACTACAAC  
 TGGCACCACGGAGCAGTACAGTACTCAGGAGGCCGTTTACCATCCCTACAGGTGCGGGCAAACCGAGGG  
 GACAGCGGTAGACCGATCTTCGACAACAAGGGGCGCGTGGTGGCCATAGTTTTAGGAGGAGCTAATGAA  
 GGAGCCCGTACAGCCCTCTCGGTGGTGACCTGGAACAAAGACATCGTCACGAAAATCACCCCTGAGGGG  
 GCCGAAGAGTGGAGTCTTGCCATTatggtgagcgagctgattaaggagaacatgcacatgaagctgtacatggaggccacg  
 tgaacaaccaccacttcaagtgcacatccgagggcggaagggaagccctacgagggcaccagacatgagaatcaaggcggtcgaggg  
 cggccctctccccttcgcttcgacatcctggctaccagcttcatgtacggcagcaaaccttcatcaaccacaccagggcatccccgacttc  
 ttaagcagtccttccccgaggggttcacatgggagagagtcaccacatacgaagacggggcggtgctgaccgtaccaggacaccagc  
 ctccaggacgggtgcctcatctacaacgtcaagatcagaggggtgaactcccatccaacggccctgtgatgcagaagaaaactcgggt  
 gggaggcctccaccgagaccctgtaccccgctgacggcggtggaaggcagagccgacatggccctgaagctcgtggcgggggcc

acctgatctgcaacttgaagaccacatacagatccaagaaacccgctaagaacctcaagatgcccggcgctactatgtggacagaagact  
ggaaagaatcaaggaggccgacaaagagacctacgtcgagcagcagaggtggctgtggccagatactgcgacctccctagcaaactg  
gggcacagaaactttgacctacttaagttggcgggagacgttgagccaacctgggcccAGTCTTGCCATTCCAGTTATGTGC  
CTGCTGGCAAATACCACGTTCCCCTGCTCCCAGCCCCCTTGACACCCTGCTGCTACGAAAAAGAGCCGGA  
GAAAACCCTGCGCATGCTAGAAGACAACGTCATGAGCCCCGGTACTATCAGCTGCTACAAGCATCCTTA  
ACATGTTCTCCCCGCCGCCAGCGACGCAGTATTAAGGACAACCTCAATGTCTATAAAGCCATAAGACCGTA  
CCTAGCTCACTGTCCCGACTGTGGAGAAGGGCACTCGTGCCATAGTCCCGTAGCGCTAGAACGCATCAGA  
AACGAAGCGACAGACGGGACGCTGAAAATCCAGGTTTCCTTGCAAATCGGAATAAAGACGGATGATAGC  
CATGATTGGACCAAGCTGCGTTACATGGACAATCATATGCCAGCAGACGCAGAGAGGGCCAGGCTATTTG  
TAAGAACGTCAGCACCGTGACGATTACTGGAACAATGGGACACTTCATCCTGGCCCGATGTCCGAAAGG  
AGAAACTCTGACGGTGGGATTCACTGACGGTAGGAAGATCAGTCACTCATGTACGCACCCATTTACCACG  
ACCTCCTGTGATAGGCCGGGAAAAATTTATTCCCGACCGCAGCACGGTAGAGAACTACCTTGACAGCAC  
GTACGCGCAGAGCACCGCTGCAACTGCCGAGGAGATAGAGGTACATATGCCCCCAGACACCCAGATCG  
CACATTGATGTCACAACAGTCCGGTAATGTAAAGATCACAGTCAATAGTCAGACGGTGCGGTACAAGTGT  
AATTGCGGTGACTCAAATGAAGGACTAACCCTACAGACAAAGTGATTAATAACTGCAAGGTTGATCAATG  
CCATGCCGCGGTACCAATCACAAAAAATGGCAGTATAATTCCCCTCTGGTCCCGCGTAATGCTGAACTCG  
GGGACCGAAAAGGAAAAGTTCACATTCGGTTTCCTCTGGCAAATGTGACATGCAGGGTGCCTAAGGCAAG  
GAACCCACCGTGACGTACGGAAAAAACCAAGTCATCATGCTGCTGTATCCTGACCACCCAACGCTCCTGT  
CCTACCGGAATATGGGAGAAGAACCAACTATCAAGAAGAGTGGGTGACGCATAAGAAGGAGATCAGGT  
TAACCGTGCCGACTGAAGGGCTCGAGGTCACGTGGGGCAACAACGAGCCGTACAAGTATTGGCCGCAGTT  
ATCCACAAACGGTACAGCCACGGCCACCCGCATGAGATAATTTTGTATTATTATGAGCTGTACCCTACTAT  
GACTGTGGTAGTTGTGTGTCAGTGGCCTCGTTCTGACTCCTGTGATGGTGGGTGTGGCAGTGGGGATGTGCA  
TGTGTGCACGACGCAGATGCATTACACCGTACGAACTGACACCAGGAGCTACCGTCCCTTTCCTGCTTAGC  
CTAATATGCTGCATTAGAACAGCTAAAGCGGCCACATACCAAGAGGCTGCGGTATACCTGTGGAACGAGC  
AGCAGCCTTTGTTTTGGCTGCAAGCCCTTATTCCGCTGGCAGCCCTGATTGTCCTATGCAACTGTCTGAGAC  
TCTTACCATGCTTTTGTAAAACGTTGACTTTTTTGTAGCCGTAATGAGCGTCGGTGCCACACTGTGAGCGCGT  
ACGAACACGTAACAGTGATCCCGAACACGGTGGGAGTACCGTATAAGACTCTAGTCAACAGACCGGGCTA  
CAGCCCCATGGTACTGGAGATGGAGCTTCTGTGTCAGTCACTTTGGAGCCAACGCTATCGCTTGATTACATCA  
CGTGCGAGTATAAAACCGTCATCCCGTCTCCGTACGTGAAATGCTGCGGTACAGCAGAGTGAAGGACAA  
GAGCCTACCTGATTACAGCTGTAAGGTCTTACCCGGCGTCTACCCATTCATGTGGGGCGGCGCCTACTGCT  
TCTGCGACACTGAAAATACGCAATTGAGCGAAGCACATGTGGAGAAGTCCGAATCATGCAAAACAGAATT  
TGCATCAGCATATAGGGCTCATACCGCATCCGCATCAGCTAAGCTCCGCGTCCTTTACCAAGGAAATAATG  
TACTGTATCTGCTTATGCAAACGGCGATCATGCCGTACAGTTAAGGACGCTAAATTCATTGTGGGGCCA  
ATGTCTTCAGCCTGGACACCTTTTGACAATAAAATCGTGGTGTACAAAGGCGACGTCTACAACATGGACTA  
CCCGCCCTTCGGCGCAGGAAGACCAGGACAATTTGGCGACATCCAAAGTCGCACGCCTGAGAGCGAAGA  
CGTCTATGCTAACACACAACCTGGTACTGCAGAGACCGTCCGCGGGTACGGTGACGTGCCGTACTCTCAG  
GCACCATCTGGCTTCAAGTATTGGCTAAAAGAACGAGGGGCGTCGCTGCAGCACACAGCACCATTGGCT  
GTCAAATAGCAACAAACCCGGTAAGAGCGATGAACTGCGCCGTAGGGAACATGCCTATCTCCATCGACAT  
ACCGGACGCGGCCTTCACTAGGGTCGTCGACGCGCCATCTTTAACGGACATGTCGTGTGAGGTACCAGCC  
TGCACCCACTCCTCAGACTTTGGGGGCGTAGCCATCATTAATATGCAGCCAGCAAGAAAGGCAAGTGTG  
CGGTGCATTGATGACTAACGCCGTCACTATTGGGAAGCTGAAATAGAAGTAGAAGGGAACCTCTCAGTT  
GCAAATCTCTTTTCGACGGCCCTAGCCAGCGCCGAATTCGCGTACAAGTCTGTTCTACACAAGTACACT  
GTGCAGCCGAGTGCCATCCACCGAAAGACCATATAGTCAATTACCCGGCGTCACACACCACCCTCGGGGT  
CCAAGACATTTCCGTTACGGCGATGTCATGGGTGCAGAAGATCACGGGAGGTGTGGGACTGGTTGTCGCT  
GTTGCAGCACTGATCCTAATCGTGGTGTATGCGTGTGTTTAGCAGGCACTAACTTGACAACTAGGTACG



AAGGTATATGTGTCCCCTAAGAGACACACCACATATAGCTAAGAATCAATAGATAAGTATAGATCAAAGG  
GCTGAACAACCCCTGAATAGTAACAAAATATAAAAATCAACAAAATCATAAAATAGAAAACCAGAAACA  
GAAGTAGGTAAGAAGGTATATGTGTCCCCTAAGAGACACACCATATATAGCTAAGAATCAATAGATAAGT  
ATAGATCAAAGGGCTGAATAACCCCTGAATAATAACAAAATATAAAAATCAATAAAAATCATAAAATAGAA  
AACCATAAACAGAAGTAGTTCAAAGGGCTATAAAACCCCTGAAAAGTAACAAAACATAAACTAATAAAA  
ATCAAATGAATACCATAATTGGCAATCGGAAGAGATGTAGGTACTTAAGCTTCCTAAAAGCAGCCGAACTC  
GCTTTGAGATGTAGGCGTAGCACACCGAACTCTCCATAATTCTCCGAACCCACAGGGACGTAGGAGATGT  
TCAAAGTGGCTATAAAACCCCTGAACAGTAATAAAACATAAAATTAATAAGGATCAAATGAGTACCATAATT  
GGCAAACGGAAGAGATGTAGGTACTTAAGCTTCCTAAAAGCAGCCGAACTCACTTTGAGATGTAGGCATA  
GCATACCGAACTCTCCACAATTCTCCGTACCCATAGGGACGTAGGAGATGTTATTTTGTTTTTAATATTCA  
AACTGTGCCTTCTAGTTGCCAGCCATCTGTTGTTGCCCTCCCCGTGCCTTCCTTGACCTGGAAGGTGC  
CACTCCCACTGTCTTTCCTAATAAAATGAGGAAATTGCATCGCATTGTCTGAGTAGGTGTCATTCTATTCTG  
GGGGGTGGGGTGGGGCAGGACAGCAAGGGGGAGGATTGGGAAGACAATAGCAGGCATGCTGGGGATGC  
GGTGGGCTCTATGGCTTCTACTGGGCGTTTTATGGACAGCAAGCGAACCAGGAATTGCCAGCTGGGGCGC  
CCTCTGGTAAGGTTGGGAAGCCCTGCAAAGTAACTGGATGGCTTCTCGCCGCCAAGGATCTGATGGCG  
CAGGGGATCAAGCTCTGATCAAGAGACAGGATGAGGATCGTTTCGCATGATTGAACAAGATGGATTGCAC  
GCAGGTTCTCCGGCCGCTTGGGTGGAGAGGCTATTCGGCTATGACTGGGCACAACAGACAATCGGCTGCT  
CTGATGCCGCCGTGTTCCGGCTGTCAGCGCAGGGGCGCCCGTTCTTTTTGTCAAGACCGACCTGTCCGGT  
GCCCTGAATGAAGTGAAGACGAGGCAGCGCGGCTATCGTGGCTGGCCACGACGGGCGTTCCTTGCGCA  
GCTGTGCTCGACGTTGTCACTGAAGCGGGAAGGGACTGGCTGCTATTGGGCGAAGTGCCGGGGCAGGAT  
CTCCTGTCATCTCACCTTGCTCCTGCCGAGAAAGTATCCATCATGGCTGATGCAATGCGGCGGCTGCATAC  
GCTTGATCCGGCTACCTGCCATTGACCACCAAGCGAAACATCGCATCGAGCGAGCACGTACTCGGATG  
GAAGCCGGTCTTGTGATCAGGATGATCTGGACGAAGAGCATCAGGGGCTCGCGCCAGCCGAACTGTTG  
CCAGGCTCAAGGCGAGCATGCCCCAGGCGAGGATCTCGTCGTGACCCATGGCGATGCCTGCTTGCCGAA  
TATCATGGTGAAAATGGCCGCTTTTCTGGATTCATCGACTGTGGCCGGCTGGGTGTGGCGGACCGCTATC  
AGGACATAGCGTTGGCTACCCGTGATATTGCTGAAGAGCTTGGCGGCGAATGGGCTGACCGCTTCCTCGT  
GCTTTACGGTATCGCCGCTCCCGATTGCGAGCGCATCGCCTTCTATCGCCTTCTTGACGAGTTCTTCTGAATT  
ATTAACGCTTACAATTTCTGATGCGGTATTTTCTCCTACGCATCTGTGCGGTATTTACACCCGCATACAGG  
TGGCACTTTTCGGGGAAATGTGCGCGGAACCCCTATTTGTTTATTTTCTAAATACATTCAAATATGTATCCG  
CTCATGAGACAATAACCCCTGATAAATGCTTCAATAATAGCACGTGCTAAAACCTTCATTTTAATTTAAAAGG  
ATCTAGGTGAAGATCCTTTTGTATAATCTCATGACCAAAAATCCCTAACGTGAGTTTTGTTCCACTGAGCGT  
CAGACCCCGTAGAAAAGATCAAAGGATCTTCTTGAGATCCTTTTTTCTGCGCGTAATCTGCTGCTTGCAAA  
CAAAAAAACCACCGCTACCAGCGGTGTTTTGTTTGCCGGATCAAGAGCTACCAACTCTTTTTCCGAAGGTA  
ACTGGCTTCAGCAGAGCGCAGATACCAAATACTGTCCTTCTAGTGTAGCCGTAGTTAGGCCACCACTTCAA  
GAACTCTGTAGCACCGCCTACATACCTCGCTCTGCTAATCCTGTTACCAAGTGGCTGCTGCCAGTGGCGATA  
AGTCGTGTCTTACCGGGTTGGACTCAAGACGATAGTTACCGGATAAGGCGCAGCGGTGCGGCTGAACGGG  
GGGTTTCGTGCACACAGCCCAGCTTGGAGCGAACGACCTACACCGAACTGAGATACCTACAGCGTGAGCTA  
TGAGAAAGCGCCACGCTTCCCGAAGGGAGAAAAGCGGACAGGTATCCGGTAAGCGGCAGGGTCGGAAC  
AGGAGAGCGCACGAGGGAGCTTCCAGGGGGAAACGCCTGGTATCTTTATAGTCCTGTCGGGTTTCGCCAC  
CTCTGACTTGAGCGTCGATTTTTGTGATGCTCGTCAGGGGGGCGGAGCCTATGGAAAAACGCCAGCAACG  
CGGCCTTTTTACGGTTCCTGGGCTTTTGCTGGCCTTTTGCTCACATGTTCTTGACTCTTCGCGATGTACGGGC  
CAGATATACGCGTTGACATTGATTATTGACTAGTTATTAATAGTAATCAATTACGGGGTCATTAGTTCATAG  
CCCATATATGGAGTTCCGCGTTACATAACTTACGGTAAATGGCCCCCTGGCTGACCGCCCAACGACCCCC  
GCCATTGACGTCAATAATGACGTATGTTCCCATAGTAACGCCAATAGGGACTTTCATTGACGTCAATGG  
GTGGACTATTTACGGTAACTGCCCACTTGGCAGTACATCAAGTGATCATATGCCAAGTACGCCCCCTATT

GACGTCAATGACGGTAAATGGCCCGCCTGGCATTATGCCCAGTACATGACCTTATGGGACTTTCCTACTTG  
GCAGTACATCTACGTATTAGTCATCGCTATTACCATGGTGATGCGTTTTGGCAGTACATCAATGGGCGTG  
GATAGCGTTTTGACTCACGGGGATTTCCAAGTCTCCACCCCATTGACGTCAATGGGAGTTTGTGTTTGGCAC  
CAAAATCAACGGGACTTTCCAAAATGTCGTAACAACTCCGCCCCATTGACGCAAATGGGCGGTAGGCGTG  
TACGGTGGGAGGTCTATATAAGCAGAGCT

#### pACNR-CHIKV replicon sequence annotated

| Feature               | Location (nts) | Orientation with respect<br>the CMV promoter | Type                                                                                                                                          |
|-----------------------|----------------|----------------------------------------------|-----------------------------------------------------------------------------------------------------------------------------------------------|
| 5' UTR                | 1 to 65        | Right                                        | 5' Untranslated region                                                                                                                        |
| Capsid                | 66 to 848      | Right                                        | CDS – capsid protein – 29.6 kDa                                                                                                               |
| E3 (partial)          | 849 to 860     | Right                                        | CDS – partial sequence of the E3 chaperone – This allows the correct autoproteolytic cleavage between C and mKate2 – 402 Da                   |
| mKate2                | 861 to 1,556   | Right                                        | CDS – reporter gene mKate2 – 26.1 kDa                                                                                                         |
| FMV2                  | 1,557 to 1,607 | Right                                        | CDS – Foot and mouse disease virus cleave site to separate mKate 2 from E3.                                                                   |
| E3                    | 1,608 to 1,799 | Right                                        | CDS – E3 protein – 7.3 kDa                                                                                                                    |
| E2                    | 1,800 to 3,068 | Right                                        | CDS – E2 glycoprotein – 47.5 kDa                                                                                                              |
| 6K                    | 3,069 to 3,251 | Right                                        | CDS – 6K protein – 6.8 kDa                                                                                                                    |
| E1                    | 3,252 to 4,571 | Right                                        | CDS – E1 glycoprotein – 47.5 kDa                                                                                                              |
| 3' UTR                | 4,572 to 5,297 | Right                                        | 3' Untranslated region that includes the viral polyA                                                                                          |
| $\beta$ -globin polyA | 5,298 to 5,522 | Right                                        | $\beta$ -globin polyadenylation signal and transcription terminator                                                                           |
| NeoR/KanR             | 5,695 to 6,489 | Right                                        | Aminoglycoside phosphotransferase confers resistance to neomycin, kanamycin, and G418 (Geneticin®) for selection in <i>E. coli</i> – 29.0 kDa |
| pUC ori               | 6,815 to 7,403 | Right                                        | Origin of replication for <i>E. coli</i>                                                                                                      |
| CMV enhancer          | 7,504 to 7,883 | Right                                        | Enhancer for the Cytomegalovirus promoter for mammalian cell lines.                                                                           |
| CMV promoter          | 7,884 to 8,087 | Right                                        | Cytomegalovirus transcription promoter for mammalian cell lines.                                                                              |

pACNR-Rep plasmid map

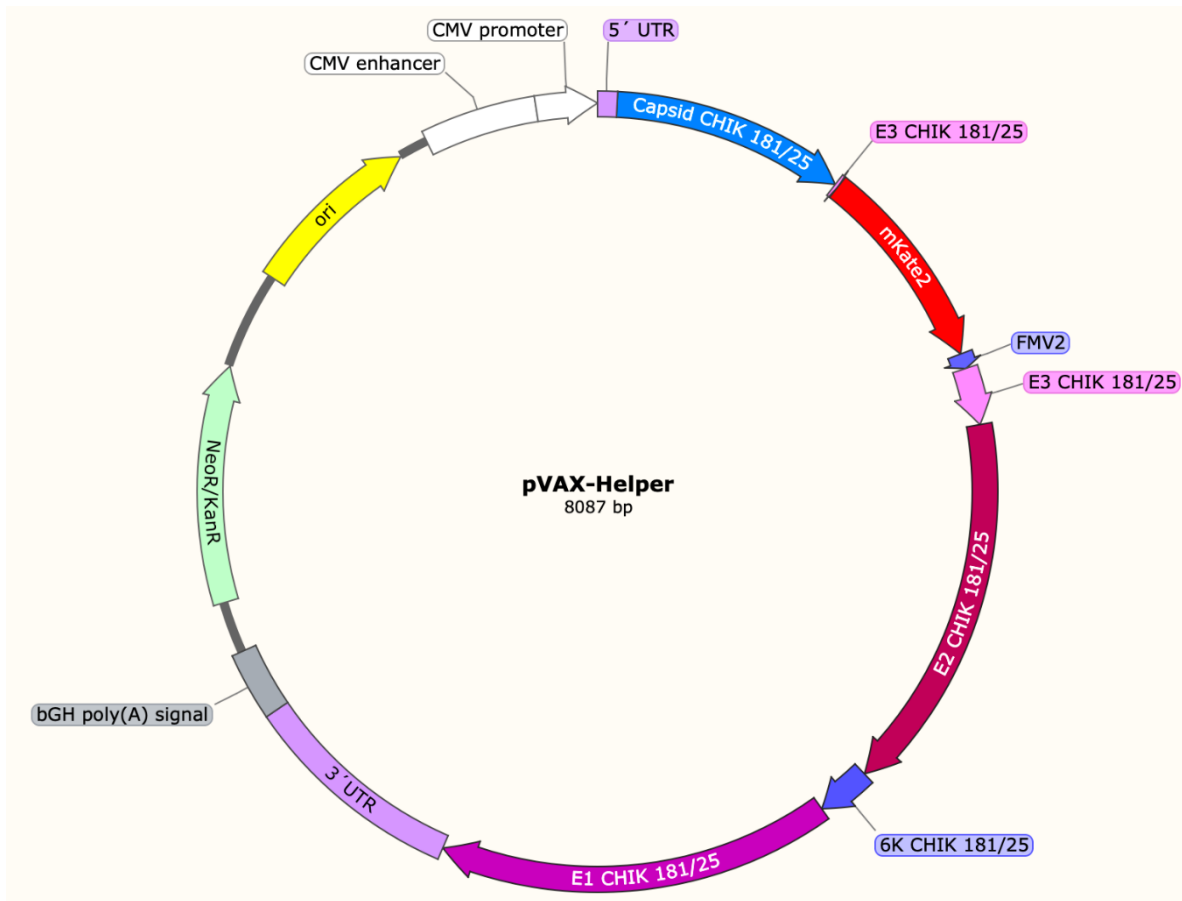

Supplement: s1 [file s1]
